# Supplementary material
Source: PubMed Central journal article supplement (PMC6643973)
Supplement: ao7b00343_si_001.pdf [file ao7b00343_si_001.pdf]

# Zein microneedles for transcutaneous vaccine delivery: fabrication, characterization and in- vivo evaluation using ovalbumin as model antigen

*Shubhmita Bhatnagar<sup>1</sup>, Sumeet Rajesh Chawla<sup>1</sup>, Onkar Prakash Kulkarni<sup>1</sup>, Venkata Vamsi  
Krishna Venuganti<sup>1\*</sup>*

<sup>1</sup>Department of Pharmacy, Birla Institute of Technology and Science (BITS) Pilani,  
Hyderabad Campus, Shameerpet, Hyderabad 500078, Telangana, India.

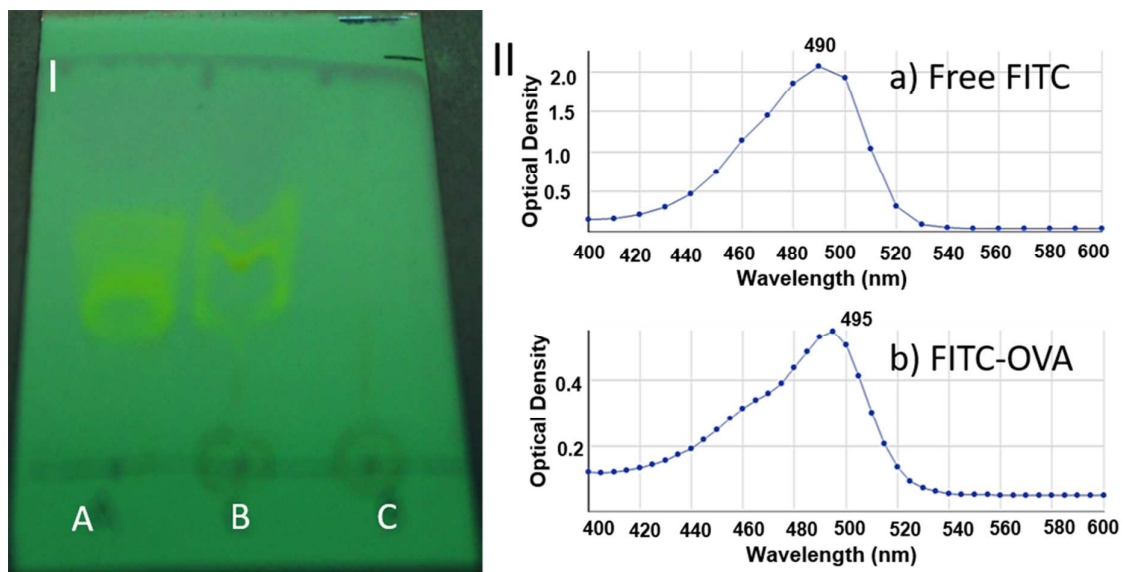

**Figure S1.** Thin layer chromatography showing spots after reaction for FITC conjugation of ovalbumin A) Free FITC B) Reaction mixture C) Co-spot of A and B. II. Shift in  $\lambda_{\max}$  for FITC-OVA (b) compared to free FITC (a)

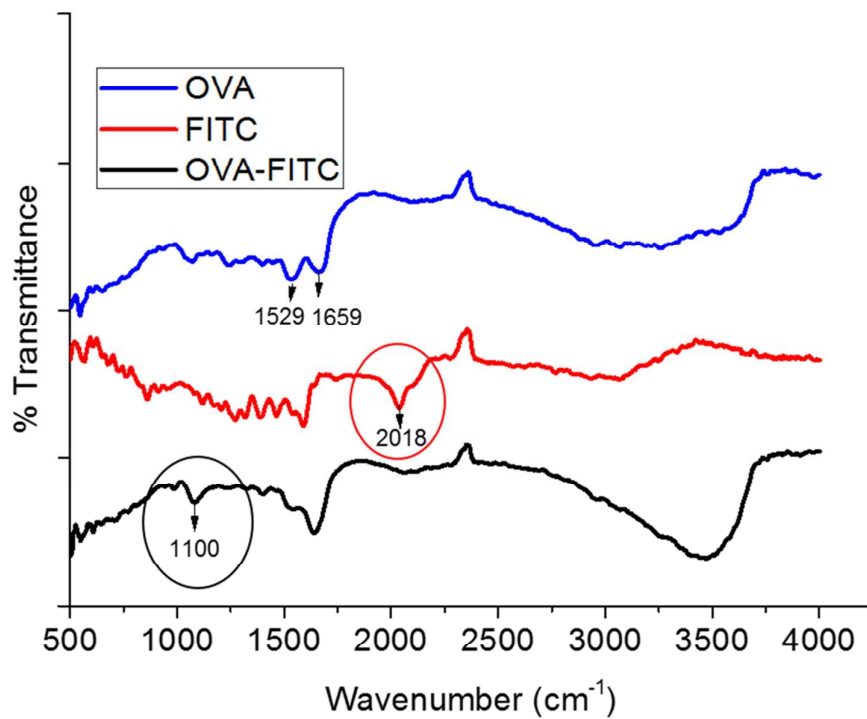

**Figure S2.** FT-IR spectra for pure ovalbumin, FITC and FITC-OVA conjugate. The ellipse represents characteristic isothiocyanate peak for FITC and appearance of thiourea stretching bands for FITC-OVA conjugate. Each spectra is representative of three different runs.

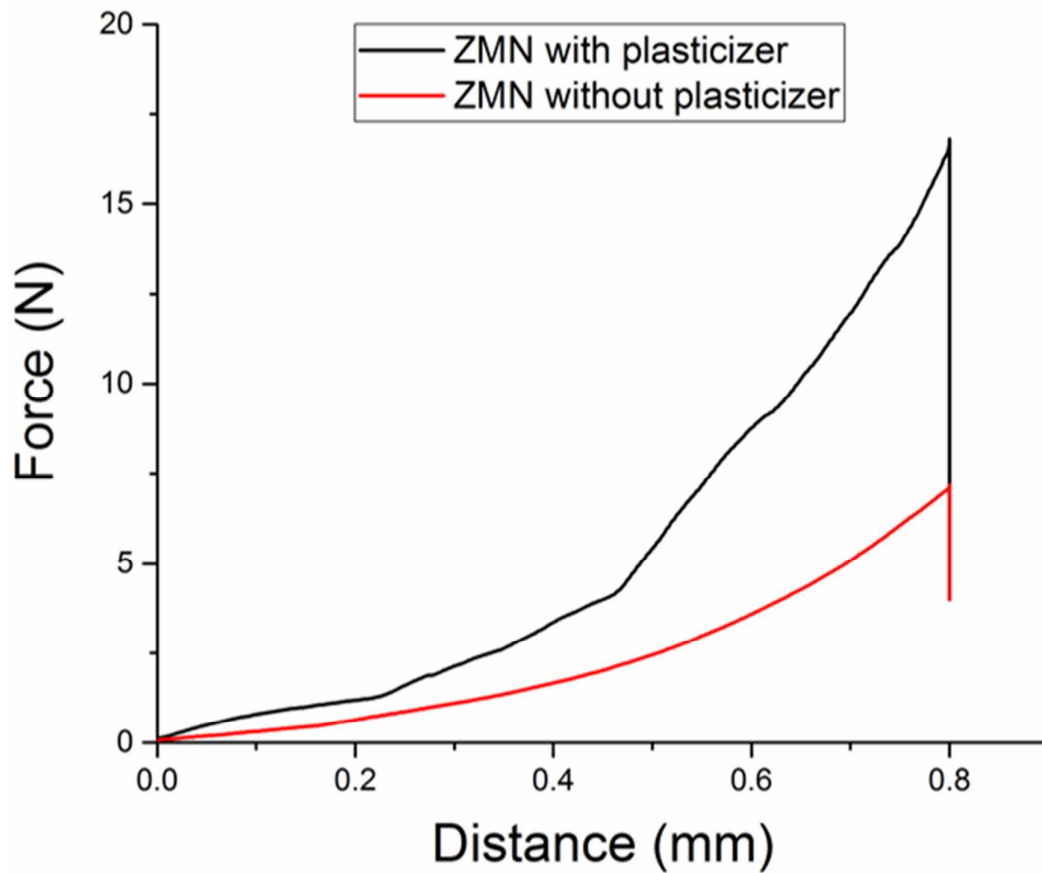

**Figure S3.** Texture analyser force displacement plots for investigating the effect of plasticizer on the strength of zein MN. A cylindrical Delrin probe (10mm Diameter) was lowered on the microneedle array placed using a two sided tape on a heavy duty metal base. A test speed of 0.5 mm/s was employed for the measurement. Each plot represents average of three experiments.
